# Supplementary material for: Phase seeding of a terahertz quantum cascade laser
Source: PubMed Central journal article supplement — Nat Commun. 2010 Sep;1(6):1–6. doi: 10.1038/ncomms1068 (PMC2982179; doi:10.1038/ncomms1068), 2010-09
Supplement: ncomms1068-s1.pdf [file ncomms1068-s1.pdf]

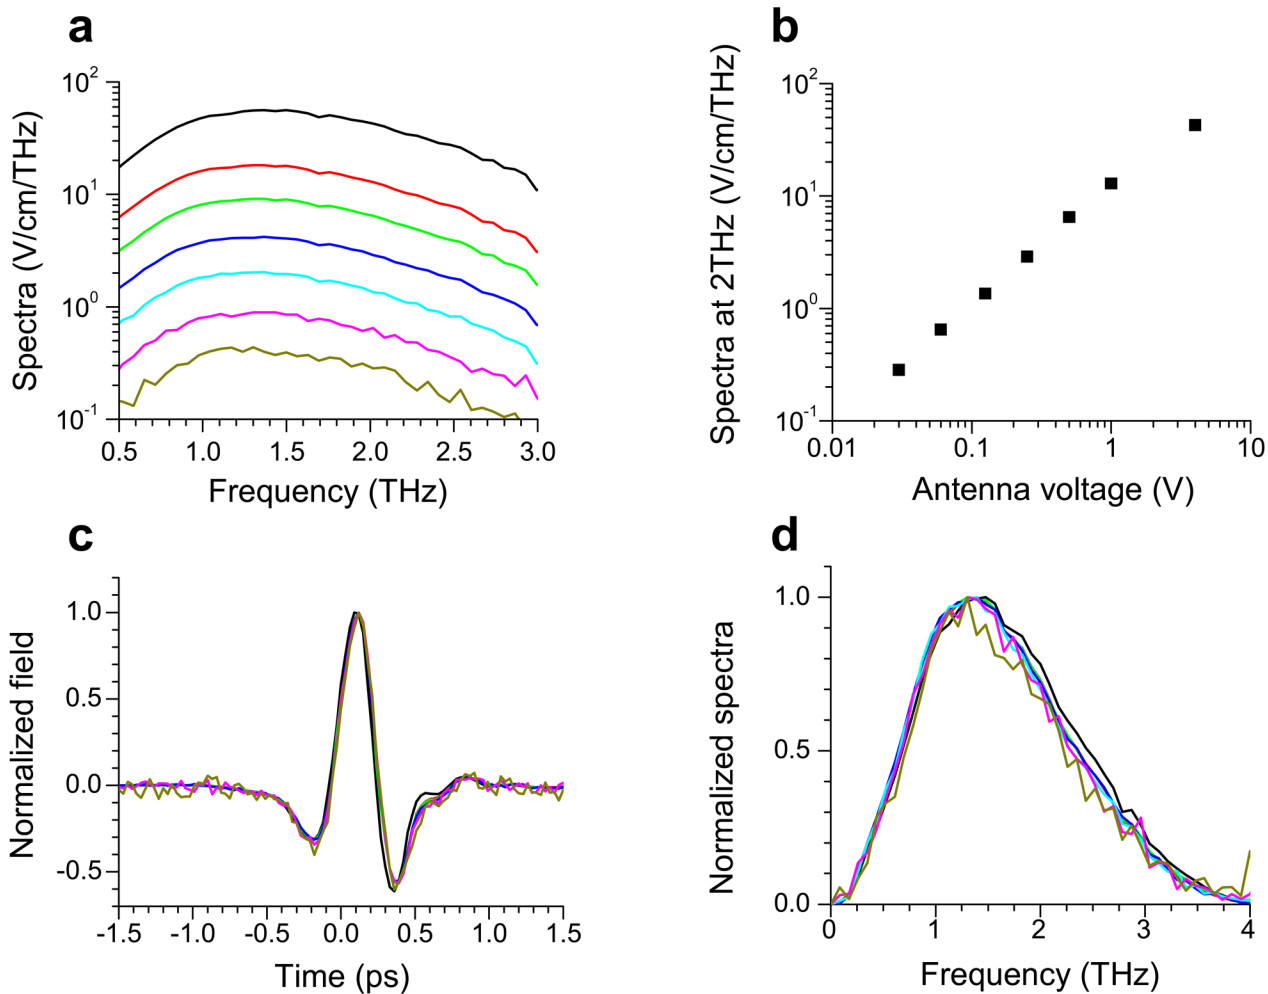

**Supplementary Figure S1 | Input THz pulse amplitude dependence on antenna voltage**

**a**, Spectral amplitude of THz pulses with different antenna voltages (black 4V, red 1V, green 0.5V, blue, 0.25V, cyan 0.125V, magenta 0.06V dark yellow 0.03V) on a logarithmic vertical scale. The QCL and cryostat are removed from the experimental-set up. **b**, Spectral amplitude of the THz pulses at 2.0 THz versus antenna voltage. The spectral amplitude varies linearly with antenna voltage. **c**, Normalized electric field of THz pulses generated with different antenna voltages. **d**, Normalized spectral amplitude of THz pulses generated with different antenna voltages. The frequency content of the THz pulses does not change with the antenna voltage.
